# Supplementary material for: A Phase I, Single Ascending Dose Study of Cimaglermin Alfa (Neuregulin 1β3) in Patients With Systolic Dysfunction and Heart Failure
Source: PubMed Central journal article supplement — JACC Basic Transl Sci. 2016 Dec 26;1(7):576–86. doi: 10.1016/j.jacbts.2016.09.005 (PMC6113538; doi:10.1016/j.jacbts.2016.09.005), 2016-12-26

## Appendix 1.

Given the small size of each dose cohort, patients were pooled by dose levels into approximately equal groups (placebo, low and high doses) in a post hoc manner. The low dose group (n=12) comprises the 0.007, 0.021, 0.063 mg/kg cohorts and the high dose group (n=15) comprises the 0.189, 0.378, 0.75 and 1.5 mg/kg groups. Additionally, the initial dose levels were anticipated to be sub-therapeutic based on pre-clinical studies and were included to ensure safety in a first-in-human study. Below are the LVEF, LVESV and LVEDV for each dose group at each time point. These values are reported in the main body of the paper in [Table 4. Cardiac Parameters and Biomarkers](#) as mean (SD) for the pooled dose levels at each timepoint.

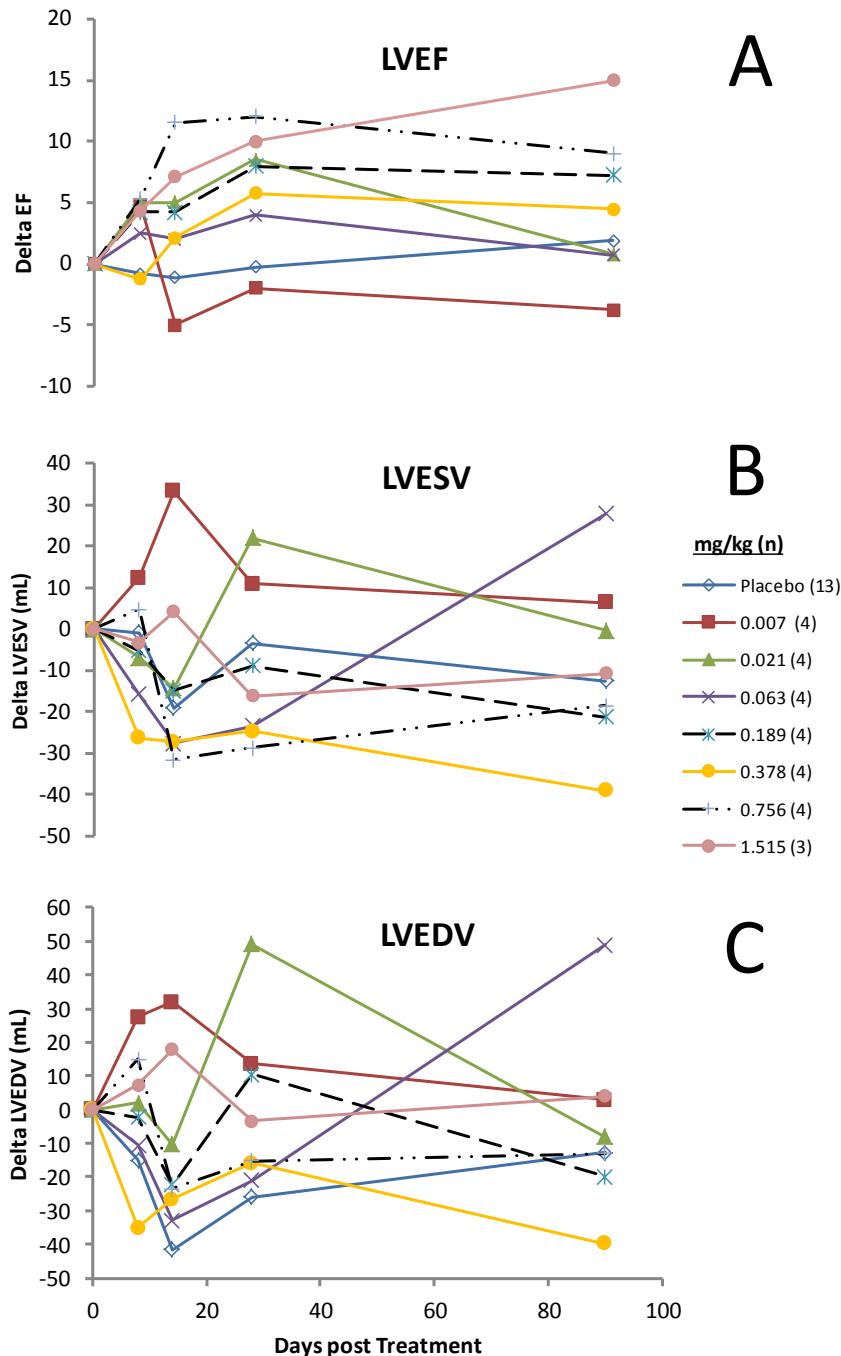

Supplement: mmc1.pdf [file mmc1.pdf]
